# Supplementary material for: Visualization of HOCl in the brains of Alzheimer's disease models using an easily available two-photon fluorogenic probe
Source: Royal Society of Chemistry journal article supplement (doi:10.1039/d2tb01502a), 2022-01-01
Supplement: d2tb01502a1.pdf [file d2tb01502a1.pdf]

## Supporting Information

### Visualization of HOCl in the brains of Alzheimer's Disease models by an easily available two-photon fluorogenic probe

Jia Ke, Peixu Zhao, Jianfeng Li, Qiang Fu\*

Wuya College of Innovation, Shenyang Pharmaceutical University, Shenyang 110016, China.

\*E-mail addresses: fuqiang@syphu.edu.cn

### Contents

|                                                             |   |
|-------------------------------------------------------------|---|
| 1. Materials and instruments.....                           | 2 |
| 2. Synthesis route.....                                     | 2 |
| 3. Comparison of fluorogenic probes for HClO .....          | 2 |
| 4. Two photon properties of probe Q-HOCl.....               | 4 |
| 5. Photostability of probe Q-HOCl.....                      | 4 |
| 6. The proposed reaction mechanism of probe with HOCl ..... | 5 |
| 7. MTT assay .....                                          | 6 |
| 8. The influence of pH values.....                          | 6 |
| 9. The determination of lipophilicity (Log <i>P</i> ) ..... | 7 |
| 10. Imaging of exogenous HOCl in PC12 cells.....            | 7 |
| 11. Hematoxylin and eosin (H&E) staining .....              | 7 |
| 12. Water maze experiment .....                             | 8 |
| 13. Mass and NMR characterization of compounds.....         | 8 |

## 1. Materials and instruments

Unless otherwise stated, all reagents in this work were obtained from commercial suppliers and used without further purification. Nuclear magnetic resonance (NMR) spectra were recorded on a Bruker Avance III for  $^1\text{H-NMR}$  or  $^{13}\text{C-NMR}$  with chemical shifts reported as ppm (TMS as internal standard and  $\text{DMSO-d}_6$  as solvent reagent). High resolution mass spectra (HRMS) were measured using Bruker Apex IV Fourier transform mass spectrometry (FTMS) under electrospray ionization (ESI) model. For spectral properties, absorption spectra were recorded on a Purkinje TU-1901 spectrophotometer and fluorescent emission were conducted using a Hitachi F-7000 fluorescence spectrometer. pH measurements were carried out using a Mettler Toledo FE-30 pH meter. MTT assay was conducted utilizing Multiskan FC microplate reader, Thermo Fisher. Fluorescence imaging in living cells were acquired by confocal laser scanning microscope (CLSM, Olympus IX81).

## 2. Synthesis route

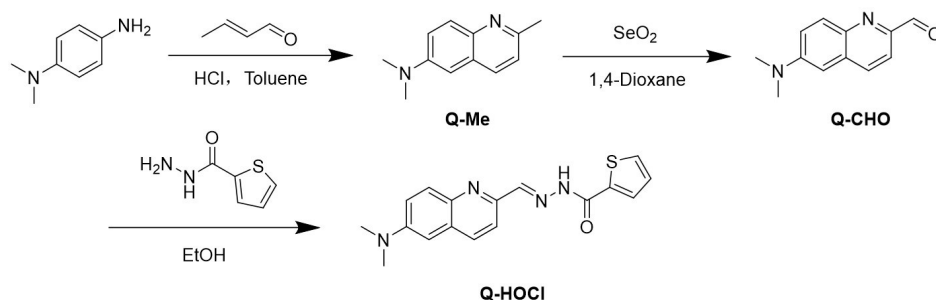

**Figure S1.** The synthesis route of Q-HOCl.

## 3. Comparison of fluorogenic probes for HClO

Table S1. Comparison of fluorogenic probes for HClO

| Probes                                                                                         | $\lambda_{\text{ex}}/\lambda_{\text{em}}$<br>(nm) | Limit of<br>detection | Response<br>time | Quantum<br>yield | Application              | Ref. |
|------------------------------------------------------------------------------------------------|---------------------------------------------------|-----------------------|------------------|------------------|--------------------------|------|
| 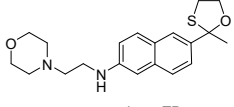<br>Lyso-TP | 356/500                                           | 16.6 nM               | seconds          | 0.380            | Cell & tissue<br>imaging | [1]  |
| <br>L1      | 405/505                                           | 0.67 $\mu\text{M}$    | 2.5 min          | not<br>mentioned | Cell imaging             | [2]  |

|                                                                                               |         |              |       |               |                                              |           |
|-----------------------------------------------------------------------------------------------|---------|--------------|-------|---------------|----------------------------------------------|-----------|
| 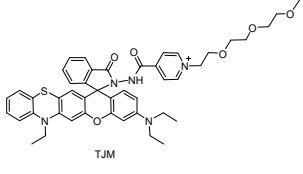<br>TJM      | 585/730 | 0.11 $\mu$ M | 7 s   | not mentioned | Cells & Zebrafish & Diabetic & tumor imaging | [3]       |
| <br>AS-C10   | 383/520 | 12.53 nM     | 5 s   | 0.057         | Cells & abdominal aorta sections imaging     | [4]       |
| <br>NUU-1    | 365/503 | 25.8 nM      | 15 s  | not mentioned | Cells & PD brain models imaging              | [5]       |
| <br>PDC      | 400/503 | 16.1 nM      | 100 s | 0.078         | Cells & osteoarthritis model imaging         | [6]       |
| <br>BP     | 546/564 | 1.9 nM       | 15 s  | not mentioned | Cells & rheumatoid arthritis model imaging   | [7]       |
| <br>G2     | 610/669 | 91 nM        | 10 s  | not mentioned | Cells & psoriasis model imaging              | [8]       |
| <br>Q-HOCl | 405/520 | 12.5 nM      | 20 s  | 0.143         | Cells & AD model mice & brain slices imaging | This work |

[1] L. Yuan, L. Wang, B. K. Agrawalla, S. J. Park, H. Zhu, B. Sivaraman, J. Peng, Q. H. Xu and Y. T. Chang, *J. Am. Chem. Soc.*, 2015, 137, 5930-5938.

[2] B. Zhang, X. Yang, R. Zhang, Y. Liu, X. Ren, M. Xian, Y. Ye and Y. Zhao, *Anal. Chem.*, 2017, 89, 10384-10390.

[3] M. He, M. Ye, B. Li, T. Wu, C.g Lu, P. Liu, H. Li, X. Zhou, Y. Wang, T. Liang, H. Li, C. Li, *Sens. Actuators B Chem.*, 364 (2022) 131868.

[4] B. Wang, F. Yuan, S. Wang, R. Duan, W.X. Ren, J.-T. Hou, Detection of atherosclerosis-associated HOCl using a mitochondria-targeted fluorescent probe, *Sens. Actuators B Chem.*, 348 (2021) 130695

[5] J. Chen, Y. Lu, Y. Wu, Z. Chen, X. Liu, C. Zhang, J. Sheng, L. Li, W. Chen, X. Song, *ACS Chem. Neurosci*, 2021, 12, 4058–4064.

[6] J. Hou, B. Wang, Y. Zou, P. Fan, X. Chang, X. Cao, S. Wang, F. Yu, *ACS Sens.* 2020, 5, 1949–1958.

[7] C. Ma, S. Hou, X. Zhou, Z. Wang, J. Yoon, *Anal. Chem.* 2021, 93, 9640–9646.

## 4. Two photon properties of probe Q-HOCl

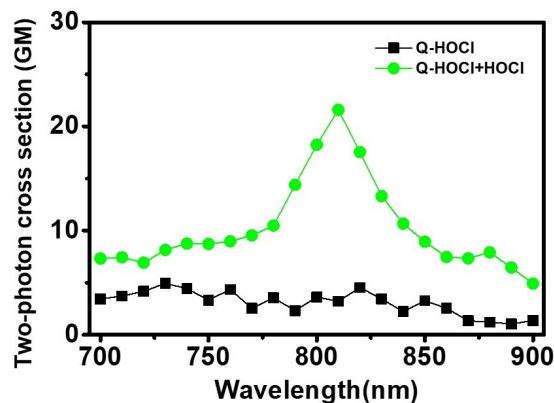

**Figure S2.** Two-photon spectra of 10  $\mu\text{M}$  Q-HOCl in the absence and presence of 20  $\mu\text{M}$  HOCl in 10 mM PBS buffer (pH=7.4, containing 5% EtOH).

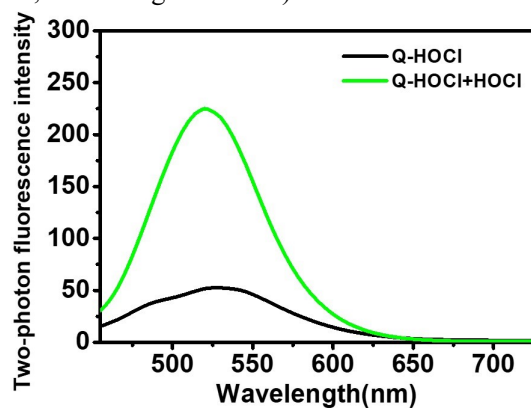

**Figure S3.** Two-photon fluorescence spectra of 10  $\mu\text{M}$  Q-HOCl before and after reaction with 20  $\mu\text{M}$  HOCl. ( $\lambda_{\text{ex}}=810\text{ nm}$ ).

## 5. Photostability of probe Q-HOCl

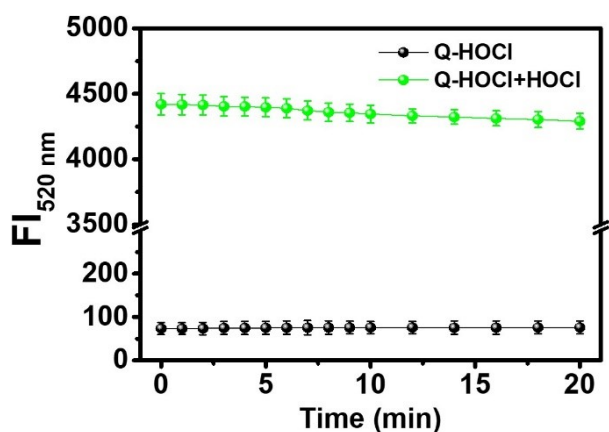

**Figure S4.** The photostability of probe Q-HOCl (Black dotted line) and the mixture of probe Q-

HOCl with the addition of 20  $\mu\text{M}$  HOCl (Green dotted line) in 10 mM PBS buffer (pH=7.4, within 5% EtOH) at room temperature.  $\lambda_{\text{ex}} = 400$  nm and slit width  $d_{\text{ex}} = d_{\text{em}} = 10$  nm.

The detection limit was calculated on the basis of the fluorescence titration test in 10 mM PBS buffer (pH=7.4, within 5% EtOH) at room temperature, and using the following equation:

$$\text{Detection limit} = 3\sigma / k$$

where  $\sigma$  is the standard deviation of blank measurements and  $k$  is the slope of the plot of fluorescent intensity at 520 nm vs HOCl concentration.

## 6. The proposed reaction mechanism of probe with HOCl

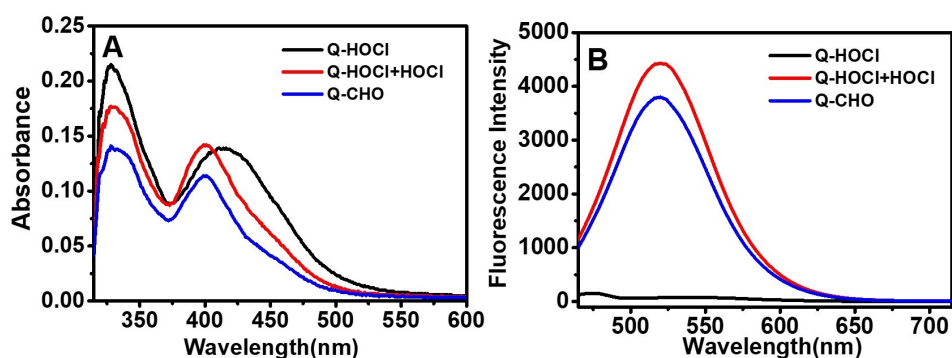

**Figure S5.** Absorption spectra (A) and fluorescence spectra (B) of 10  $\mu\text{M}$  Q-HOCl (Black line), the mixture of 10  $\mu\text{M}$  Q-HOCl with 20  $\mu\text{M}$  HOCl (Red line) and 5  $\mu\text{M}$  Q-CHO (Blue line). The sample solutions were recorded by UV-vis or fluorescence spectrometer in PBS (10 mM, pH=7.4) with 5% EtOH.  $\lambda_{\text{ex}} = 400$  nm and slit width  $d_{\text{ex}} = d_{\text{cm}} = 10$  nm.

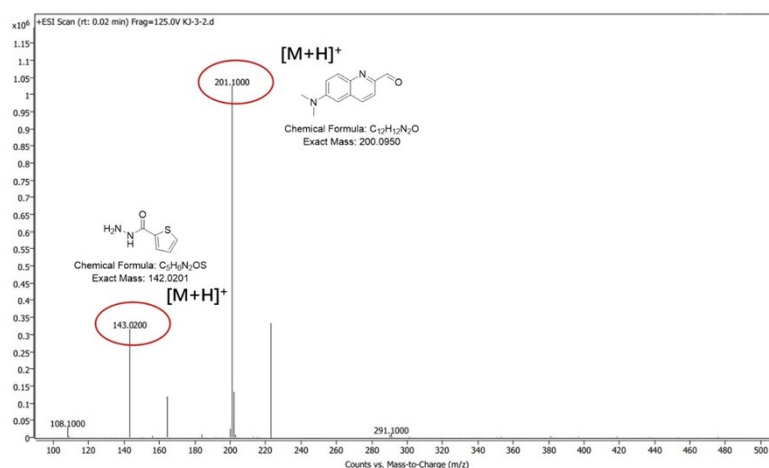

**Figure S6.** The mixture of probe Q-HOCl with HOCl (1 eq.) was purified by extraction followed by concentration, and then analyzed by ESI-MS spectral.

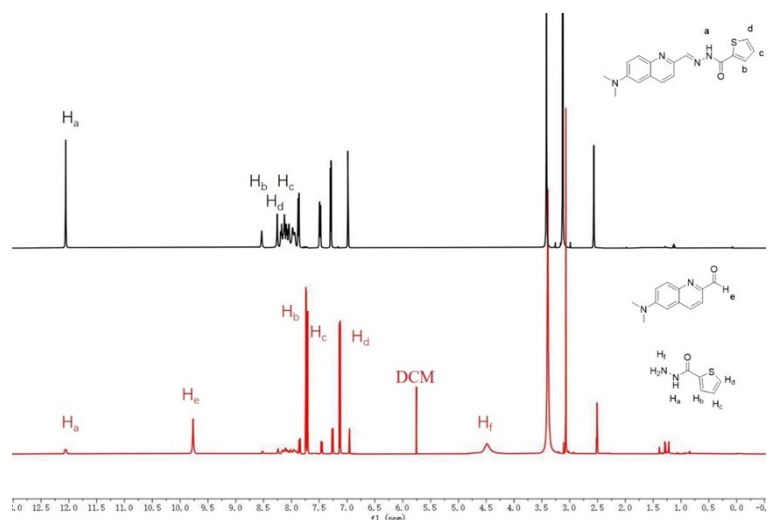

**Figure S7.** The mixture of probe Q-HOCl with HOCl (1 eq.) was purified by extraction followed by concentration, and then analyzed by the  $^1\text{H-NMR}$  spectra. Black  $^1\text{H-NMR}$  spectrogram: probe Q-HOCl, Red  $^1\text{H-NMR}$  spectrogram: the product of probe Q-HOCl with HOCl.

## 7. MTT assay

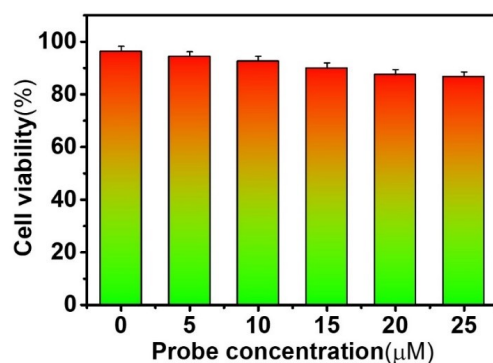

**Figure S8.** MTT assay for estimating cell viability (%) of PC12 cells were seeded into 96-well plates at a density of  $5 \times 10^3$  cells per well in culture media after treatment with a series concentration of the probe system at  $37^\circ\text{C}$  in an atmosphere of 5%  $\text{CO}_2$  and 95% air for 24 h. The concentrations of the probe Q-HOCl were used: 1. blank, 2.  $5 \mu\text{M}$ , 3.  $10 \mu\text{M}$ , 4.  $15 \mu\text{M}$ , 5.  $20 \mu\text{M}$ , 6.  $25 \mu\text{M}$ , respectively.

## 8. The influence of pH values

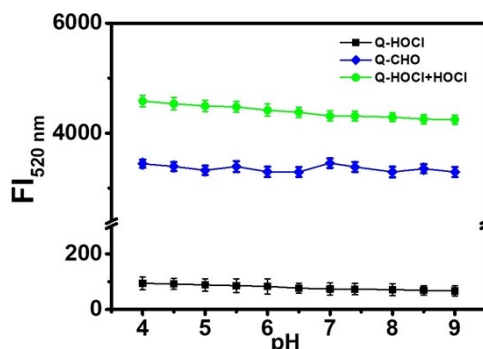

**Figure S9.** Fluorescence responses of 10  $\mu\text{M}$  probe Q-HOCl in the absence (Black dotted line) and presence (Green dotted line) of 20  $\mu\text{M}$  HOCl at different pH values and 5  $\mu\text{M}$  compound Q-CHO (Blue dotted line). All dates were performed in 10 mM PBS buffer (pH=7.4, within 5% EtOH) at room temperature.  $\lambda_{\text{ex}} = 400 \text{ nm}$  and slit width  $d_{\text{ex}} = d_{\text{em}} = 10 \text{ nm}$ .

## 9. The determination of lipophilicity (Log $P$ )

Lipophilicity ( $\log P$ ) was measured by typical flask-shaking method. Firstly, probe Q-HOCl was dissolved in a mixture solution of water and 1-octanol (1:1, V/V), and then shaken evenly for 72 h, and centri-fused for 5.0 min. The contents of the probe-Q-HOCl in 1-octanol and water were measured by fluorescence spectrophotometry.

$\log P$  was calculated by the following equation:

$$\log p = \frac{[1 - \text{octanol}]}{[\text{water}]}$$

[1-octanol] represented the probe content in organic phase and [water] represented the probe content in aqueous phase.

## 10. Imaging of exogenous HOCl in PC12 cells

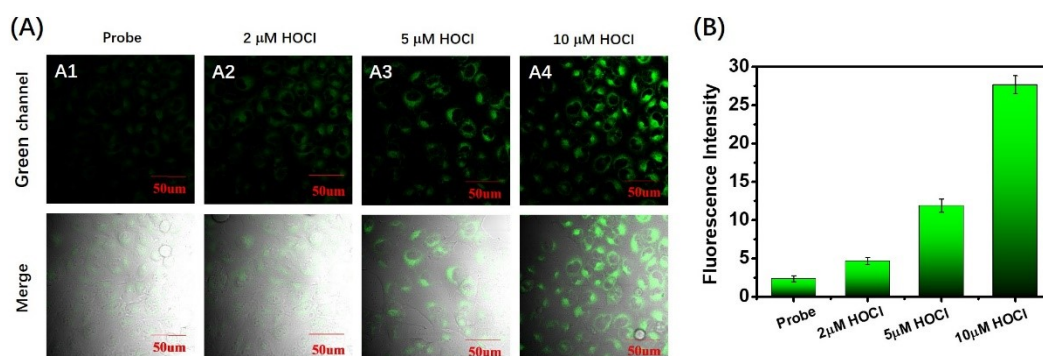

**Figure S10.** Two-photon cell imaging of exogenous HOCl in PC12 cells. (A) PC12 cells were incubated with 0  $\mu\text{M}$  HOCl (A1), 2  $\mu\text{M}$  HOCl (A2), 5  $\mu\text{M}$  HOCl (A3), 10  $\mu\text{M}$  HOCl (A4) for 10 min and then treated with 5  $\mu\text{M}$  Q-HOCl for 10 min. (B) Relative fluorescence intensity of fluorescence imaging. Green channel (460–560 nm),  $\lambda_{\text{ex}} = 810 \text{ nm}$ . Scale bar is 50  $\mu\text{m}$ . Error bars

represent standard deviation ( $\pm$ SD).

## 11. Hematoxylin and eosin (H&E) staining

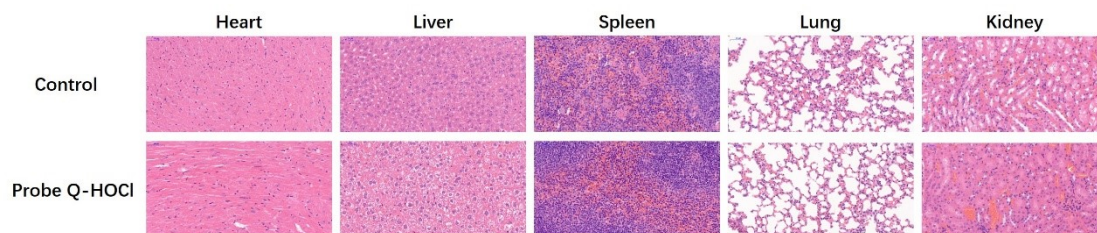

**Figure S11.** H&E staining results of various organ sections (heart, liver, spleen, lung and kidney) collected from the control group mice and probe Q-HOCl (2 mg/kg) treated group.

## 12. Water maze experiment

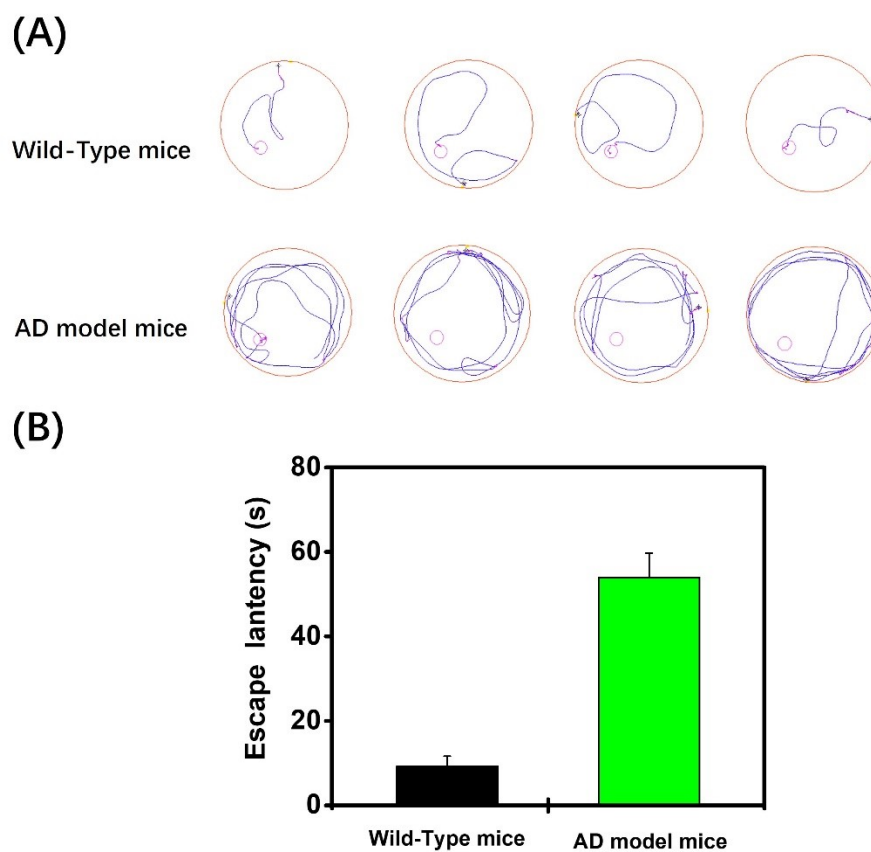

**Figure S12.** (A) Trajectories of wild-type mice group and AD model mice group. (B) The escape time collected from the wild-type mice group and AD model mice group in (A). Error bars represent standard deviation ( $\pm$ SD).



### 13. Mass and NMR characterization of compounds

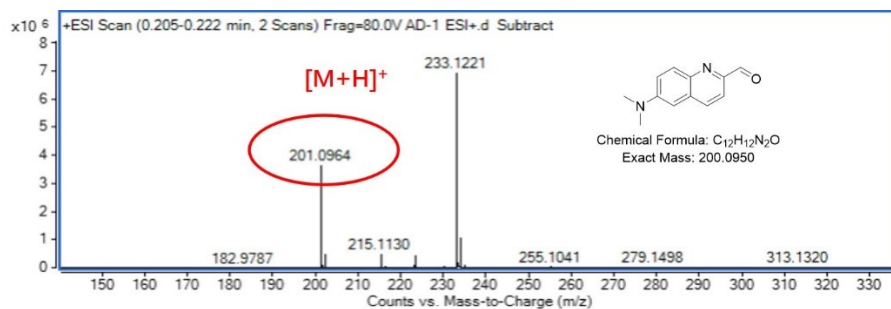

Figure S13. Mass spectrum of compound Q-CHO.

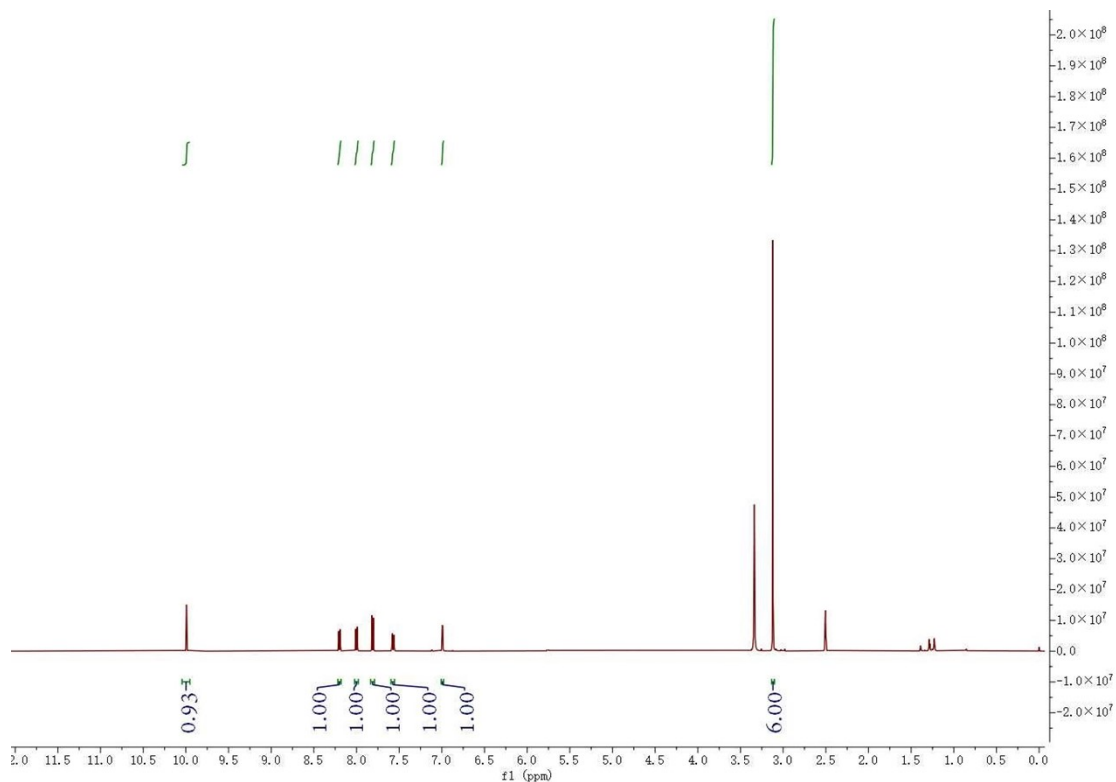

Figure S14. <sup>1</sup>H-NMR spectrum of compound Q-CHO.

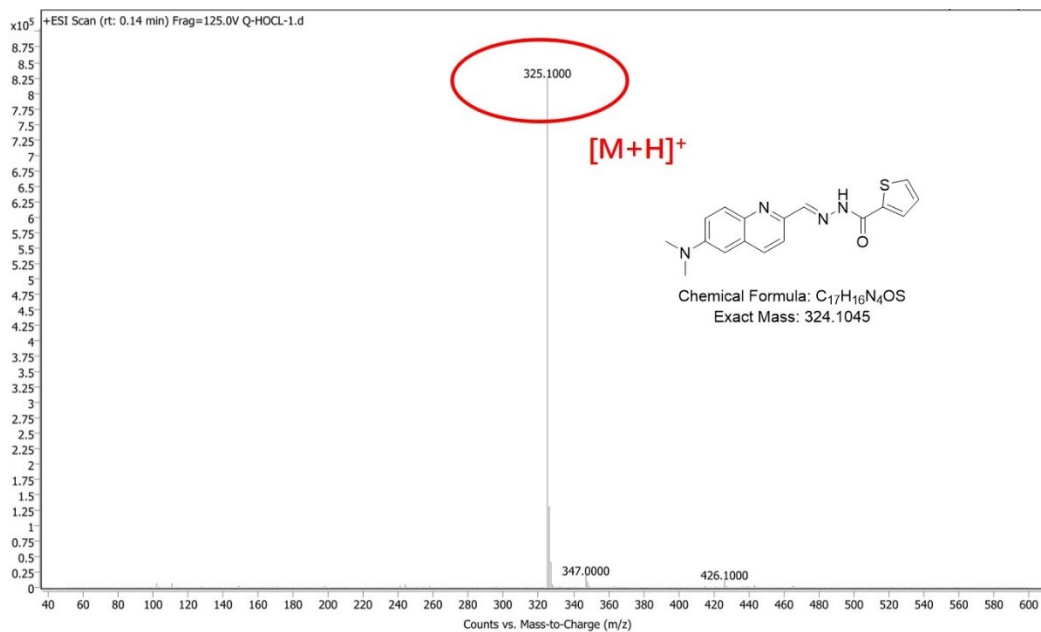

Figure S15. Mass spectrum of compound Q-HOCl.

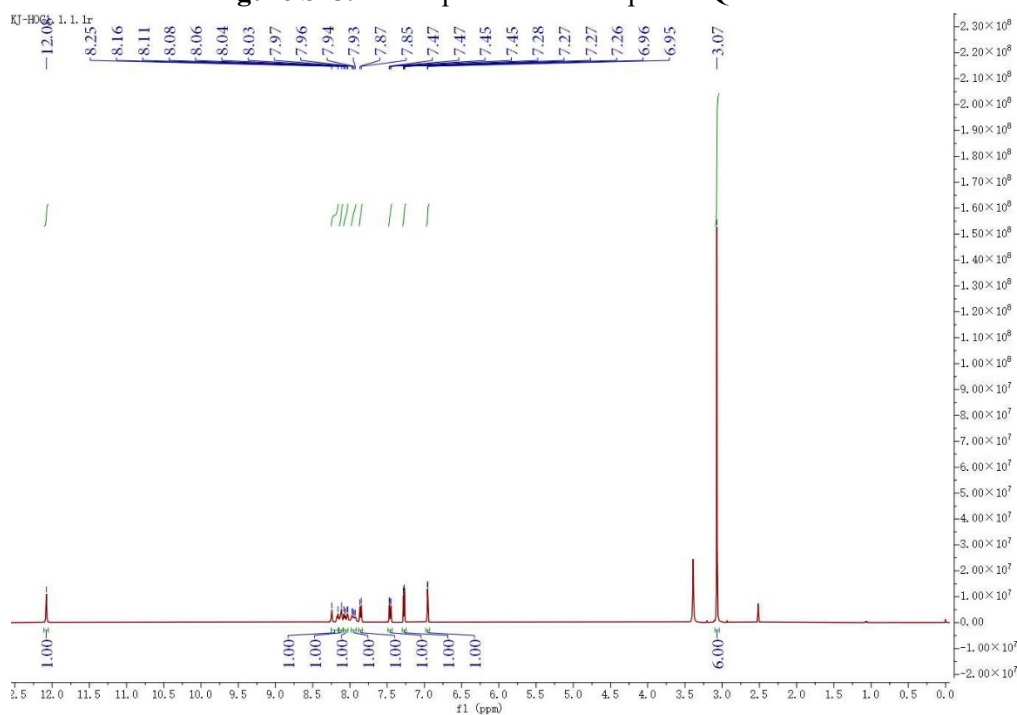

Figure S16. <sup>1</sup>H-NMR spectrum of compound Q-HOCl.

HOCl.2.1.1r

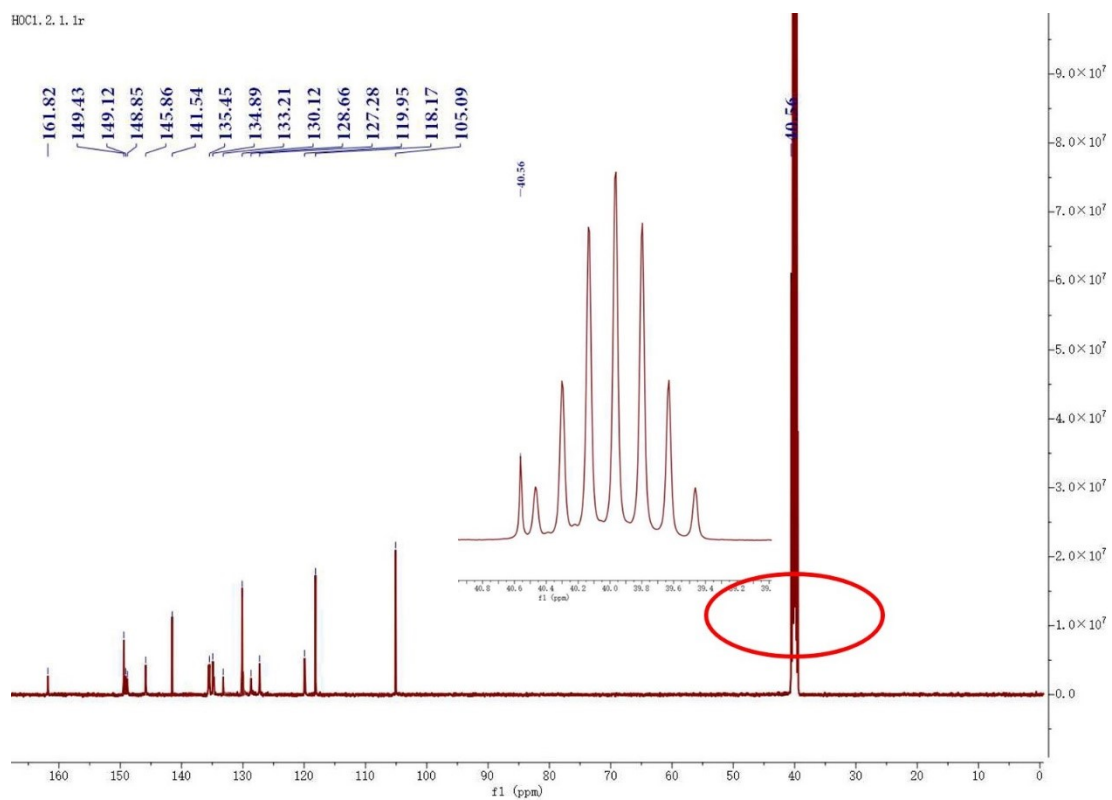

Figure S17.  $^{13}\text{C}$ -NMR spectrum of compound Q-HOCl.
